# Supplementary material for: Binder-free α-MoO3 nanobelt electrode for lithium-ion batteries utilizing van der Waals forces for film formation and connection with current collector
Source: Royal Society of Chemistry journal article supplement (doi:10.1039/c3ta01285a), 2013-01-01
Supplement: c3ta01285a.pdf [file c3ta01285a.pdf]

## Supporting Information

**Binder-free  $\alpha$ -MoO<sub>3</sub> nanobelt electrode for lithium-ion batteries utilizing van der Waals force for film formation and connection with current collector**

**Yixin Sun, Jie Wang, Bote Zhao, Rui Cai, Ran Ran, Zongping Shao\***

## Supplementary Figures

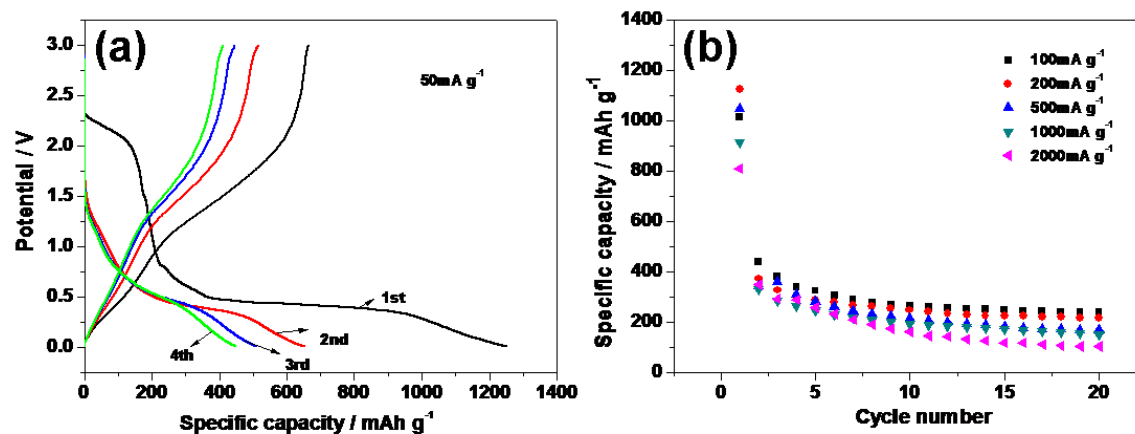

**Fig. S1** (a) The charge/discharge curves for the initial four cycles at the current density of 50 mA g<sup>-1</sup> of the MoO<sub>3</sub> contrast electrodes through the conventional route between 3.0 and 0.01 V, (b) cycling performance of the MoO<sub>3</sub> contrast electrodes through the conventional route with 20 cycles between 0.01 and 3.0 V at the current densities of 100, 200, 500, 1000 and 2000 mA g<sup>-1</sup>, respectively.

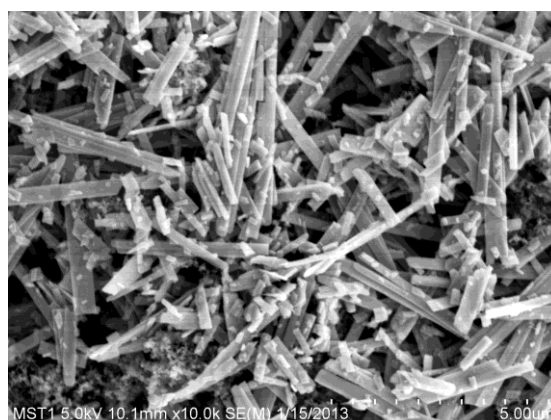

**Fig.S2** A FE-SEM image of the MoO<sub>3</sub> contrast electrodes prepared through the conventional route.

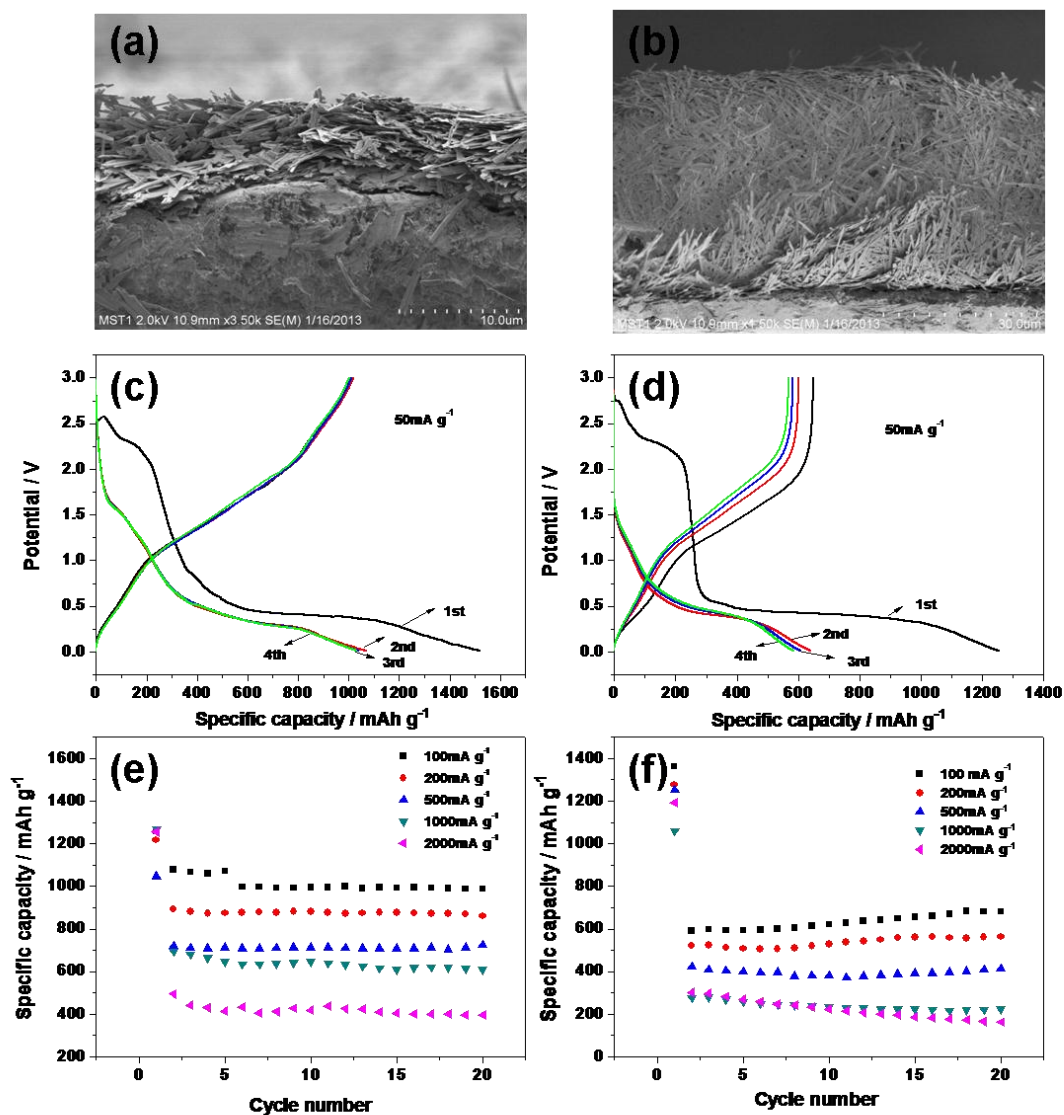

**Fig.S3** FE-SEM images of cross section of thinner (a) and thicker (b) MoO<sub>3</sub> film electrodes than the above electrode, and the charge/discharge curves for the initial four cycles at the current density of 50 mA g<sup>-1</sup> of the thinner (c) and thicker (d) MoO<sub>3</sub> electrodes between 3.0 and 0.01 V, and cycling performances of the thinner (e) and thicker (f) MoO<sub>3</sub> electrodes with 20 cycles between 0.01 and 3.0 V at the current densities of 100, 200, 500, 1000 and 2000 mA g<sup>-1</sup>, respectively.
